# Supplementary material for: Visualizing the alignment of lone pair electrons in La3AsS5Br2 and La5As2S9Cl3 to form an acentric or centrosymmetric structure
Source: Royal Society of Chemistry journal article supplement (doi:10.1039/d3ce00834g), 2023-01-01
Supplement: d3ce00834g1.pdf [file d3ce00834g1.pdf]

Visualizing the Alignment of Lone Pair Electrons in  $\text{La}_3\text{AsS}_5\text{Br}_2$  and  $\text{La}_5\text{As}_2\text{S}_9\text{Cl}_3$  to Form an  
Acentric or Centrosymmetric Structure

Andrea Cicirello <sup>a</sup>, Andrew Swindle <sup>b</sup>, Jian Wang <sup>a,\*</sup>

<sup>a</sup> Department of Chemistry and Biochemistry, Wichita State University, Wichita, Kansas 67260, United States

<sup>b</sup> Department of Geology, Wichita State University, Wichita, Kansas 67260, United States

Corresponding author Jian Wang [jian.wang@wichita.edu](mailto:jian.wang@wichita.edu)

**Supporting Information**

1. **Table S1.** Refined atomic coordinates and isotropic displacement parameters for  $\text{La}_3\text{AsS}_5\text{Br}_2$  and  $\text{La}_5\text{As}_2\text{S}_9\text{Cl}_3$ .
2. **Table S2.** Selected interatomic distances for  $\text{La}_3\text{AsS}_5\text{Br}_2$  and  $\text{La}_5\text{As}_2\text{S}_9\text{Cl}_3$ .
3. **Figure S1.** Optical microscope images of selected crystals of  $\text{La}_3\text{AsS}_5\text{Br}_2$  and  $\text{La}_5\text{As}_2\text{S}_9\text{Cl}_3$ .
4. **Figure S2.** The calculated and experimental X-ray diffraction patterns of  $\text{La}_3\text{AsS}_5\text{Br}_2$ .
5. **Figure S3.** The calculated and experimental X-ray diffraction patterns of  $\text{La}_5\text{As}_2\text{S}_9\text{Cl}_3$ .
6. **Figure S4.** Basic building units (BBU) of  $\text{La}_3\text{AsS}_5\text{Br}_2$ .
7. **Figure S5.** Basic building units (BBU) of  $\text{La}_5\text{As}_2\text{S}_9\text{Cl}_3$ .

**Table S1.** Refined atomic coordinates and isotropic displacement parameters for  $\text{La}_3\text{AsS}_5\text{Br}_2$  and  $\text{La}_5\text{As}_2\text{S}_9\text{Cl}_3$

| Atoms                                         | Wyckoff | $x$         | $y$         | $z$         | Occupancy | $U_{\text{eq}}$ ( $\text{\AA}^2$ ) |
|-----------------------------------------------|---------|-------------|-------------|-------------|-----------|------------------------------------|
| $\text{La}_3\text{AsS}_5\text{Br}_2$          |         |             |             |             |           |                                    |
| La1                                           | $4a$    | 0.1227(5)   | 0.1977(12)  | 0.3695(16)  | 1         | 0.019(8)                           |
| La2                                           | $4a$    | -0.0278(5)  | 0.1974(13)  | -0.1259(18) | 1         | 0.018(8)                           |
| La3                                           | $4a$    | 0.2744(6)   | 0.2081(15)  | 0.013(2)    | 1         | 0.019(8)                           |
| As1                                           | $4a$    | 0.3189(10)  | 0.309(2)    | -0.425(4)   | 1         | 0.023(10)                          |
| Br1                                           | $4a$    | 0.1161(9)   | 0.379(3)    | -0.020(3)   | 1         | 0.019(10)                          |
| Br2                                           | $4a$    | -0.0165(7)  | 0.387(3)    | 0.257(3)    | 1         | 0.034(10)                          |
| S1                                            | $4a$    | -0.148(2)   | 0.408(7)    | -0.115(8)   | 1         | 0.020(18)                          |
| S2                                            | $4a$    | 0.201(2)    | 0.055(6)    | 0.693(9)    | 1         | 0.002(16)                          |
| S3                                            | $4a$    | -0.116(2)   | -0.046(6)   | 0.049(8)    | 1         | 0.01(2)                            |
| S4                                            | $4a$    | 0.2431(18)  | 0.422(5)    | 0.354(7)    | 1         | 0.00(2)                            |
| S5                                            | $4a$    | 0.047(3)    | 0.052(5)    | 0.615(8)    | 1         | 0.024(18)                          |
| $\text{La}_5\text{As}_2\text{S}_9\text{Cl}_3$ |         |             |             |             |           |                                    |
| La1                                           | $4d$    | 0.79282(15) | 0.19329(15) | 0.75        | 1         | 0.0030(4)                          |
| La2                                           | $8e$    | 1.20520(11) | 0.27459(11) | 0.83927(2)  | 1         | 0.0044(4)                          |
| La3                                           | $8e$    | 0.71453(11) | 0.04165(10) | 0.95753(2)  | 1         | 0.0036(4)                          |
| As1                                           | $8e$    | 0.6919(2)   | 0.3080(2)   | 0.86781(4)  | 1         | 0.0064(5)                          |
| S1                                            | $8e$    | 0.9173(5)   | 0.1059(4)   | 0.88787(8)  | 1         | 0.0059(8)                          |
| S2                                            | $8e$    | 1.4525(5)   | 0.2479(4)   | 0.90716(8)  | 1         | 0.0052(8)                          |
| S3                                            | $8e$    | 0.5801(4)   | 0.1247(5)   | 0.67708(8)  | 1         | 0.0060(8)                          |
| S4                                            | $8e$    | 0.6137(7)   | -0.1684(7)  | 0.75        | 1         | 0.0114(12)                         |
| S5                                            | $4d$    | 1.1120(5)   | -0.0903(5)  | 0.96471(8)  | 1         | 0.0087(8)                          |
| Cl1                                           | $4c$    | 0.5538(7)   | -0.25       | 1           | 1         | 0.0067(11)                         |
| Cl2                                           | $8e$    | 1.0579(5)   | -0.0207(4)  | 0.70333(8)  | 1         | 0.0078(8)                          |

**Table S2.** Selected interatomic distances for La<sub>3</sub>AsS<sub>5</sub>Br<sub>2</sub> and La<sub>5</sub>As<sub>2</sub>S<sub>9</sub>Cl<sub>3</sub>

| Atom Pairs                                       |                                                                | Distances (Å) | Atom Pairs |         | Distances (Å) |
|--------------------------------------------------|----------------------------------------------------------------|---------------|------------|---------|---------------|
| La <sub>3</sub> AsS <sub>5</sub> Br <sub>2</sub> |                                                                |               |            |         |               |
| La1                                              | S5                                                             | 2.81(7)       | La3        | S2      | 2.83(6)       |
|                                                  | S2                                                             | 2.88(7)       |            | S2      | 2.92(5)       |
|                                                  | S5                                                             | 2.91(6)       |            | S4      | 2.92(4)       |
|                                                  | S2                                                             | 2.92(5)       |            | S1      | 2.98(6)       |
|                                                  | S4                                                             | 3.14(4)       |            | S3      | 2.98(5)       |
|                                                  | Br1                                                            | 3.06(2)       |            | S4      | 3.05(5)       |
|                                                  | Br1                                                            | 3.13(2)       |            | S1      | 3.08(5)       |
| La2                                              | Br2                                                            | 3.37(2)       | As1        | S3      | 2.25(5)       |
|                                                  | S5                                                             | 2.84(5)       |            | S1      | 2.26(5)       |
|                                                  | S5                                                             | 2.86(7)       | S4         | 2.28(5) |               |
|                                                  | S3                                                             | 3.02(6)       |            |         |               |
|                                                  | S3                                                             | 3.04(4)       |            |         |               |
|                                                  | S1                                                             | 3.08(5)       |            |         |               |
|                                                  | Br2                                                            | 3.04(3)       |            |         |               |
|                                                  | Br2                                                            | 3.10(2)       |            |         |               |
|                                                  | Br1                                                            | 3.44(3)       |            |         |               |
|                                                  | La <sub>5</sub> As <sub>2</sub> S <sub>9</sub> Cl <sub>3</sub> |               |            |         |               |
| La1                                              | S4                                                             | 2.867(5)      | La3        | Cl1     | 2.841(2)      |
|                                                  | S4                                                             | 3.029(5)      |            | Cl1     | 2.874(3)      |
|                                                  | S3                                                             | 3.132(3)      |            | S5      | 2.902(4)      |
|                                                  | S3                                                             | 3.132(3)      |            | S5      | 2.966(4)      |
|                                                  | Cl2                                                            | 2.872(3)      |            | S1      | 2.989(3)      |
|                                                  | Cl2                                                            | 2.872(3)      |            | S2      | 3.010(3)      |
|                                                  | Cl2                                                            | 2.968(3)      |            | S2      | 3.041(3)      |
|                                                  | Cl2                                                            | 2.968(3)      |            | S5      | 3.153(3)      |
| La2                                              | Cl2                                                            | 2.827(3)      | As1        | S3      | 2.258(3)      |
|                                                  | Cl2                                                            | 2.839(3)      |            | S1      | 2.269(3)      |

|     |            |    |          |
|-----|------------|----|----------|
| S3  | 2.913(3)   | S2 | 2.272(4) |
| S1  | 2.968(3)   |    |          |
| S3  | 2.977(3)   |    |          |
| S2  | 3.069(3)   |    |          |
| S1  | 3.091(3)   |    |          |
| As1 | 3.5592(16) |    |          |

---

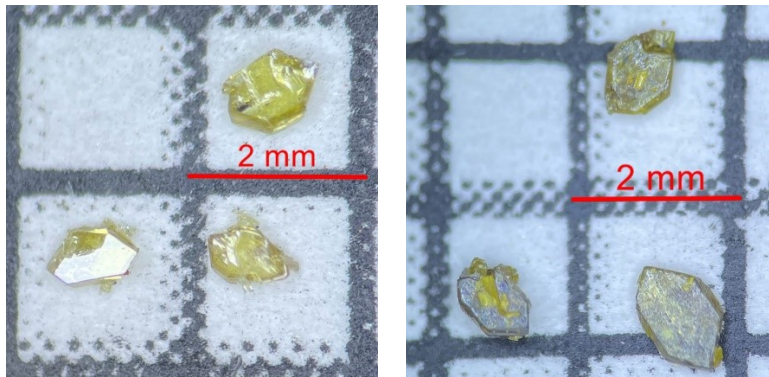

**Figure S1.** Optical microscope images of selected crystals of  $\text{La}_3\text{AsS}_5\text{Br}_2$  (left) and  $\text{La}_5\text{As}_2\text{S}_9\text{Cl}_3$  (right).

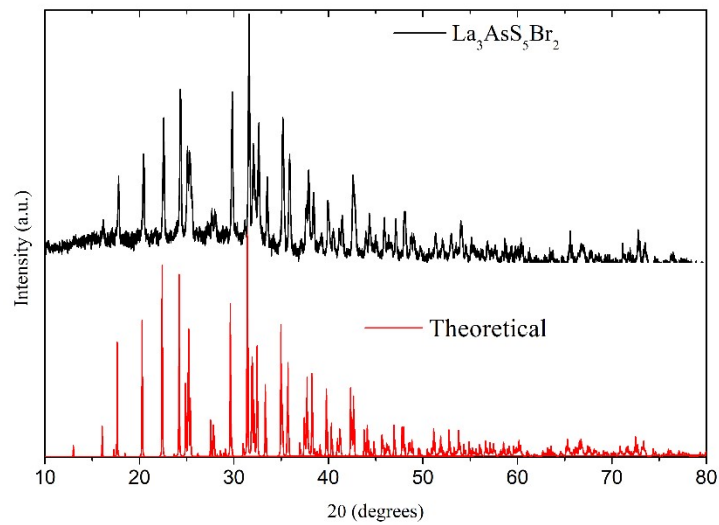

**Figure S2.** The calculated and experimental X-ray diffraction patterns of  $\text{La}_3\text{AsS}_5\text{Br}_2$ .

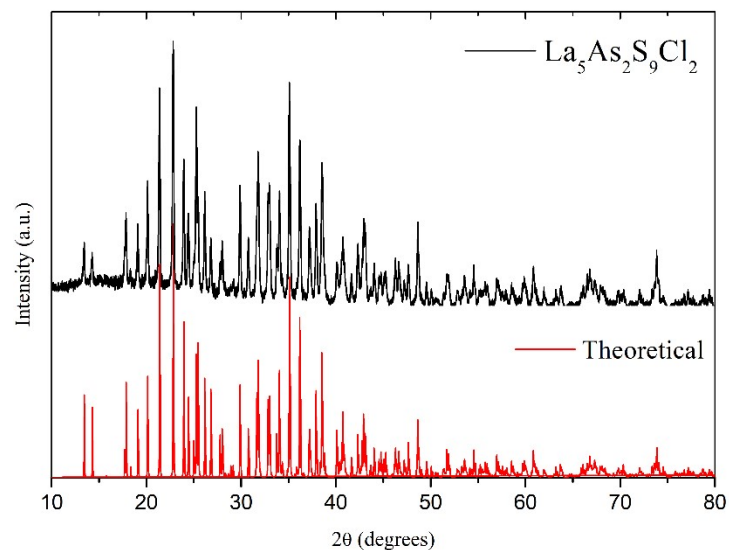

**Figure S3.** The calculated and experimental X-ray diffraction patterns of  $\text{La}_5\text{As}_2\text{S}_9\text{Cl}_3$ .

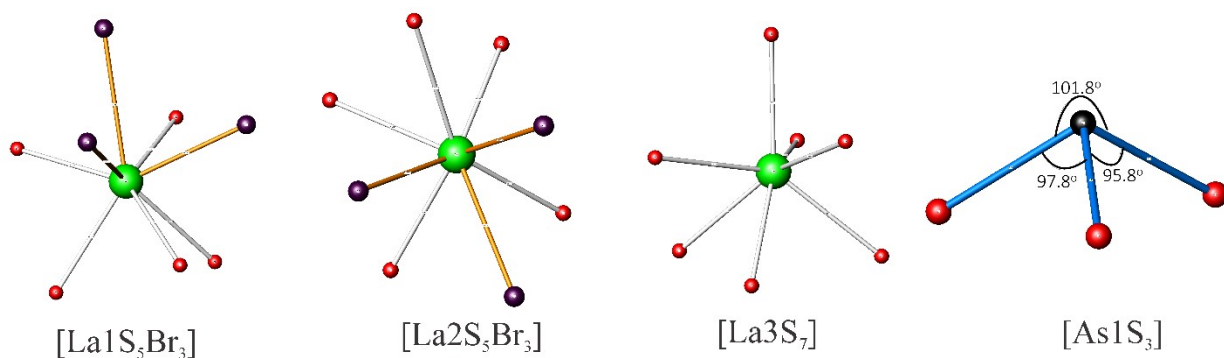

**Figure S4.** Basic building units (BBU) of  $\text{La}_3\text{AsS}_5\text{Br}_2$ .

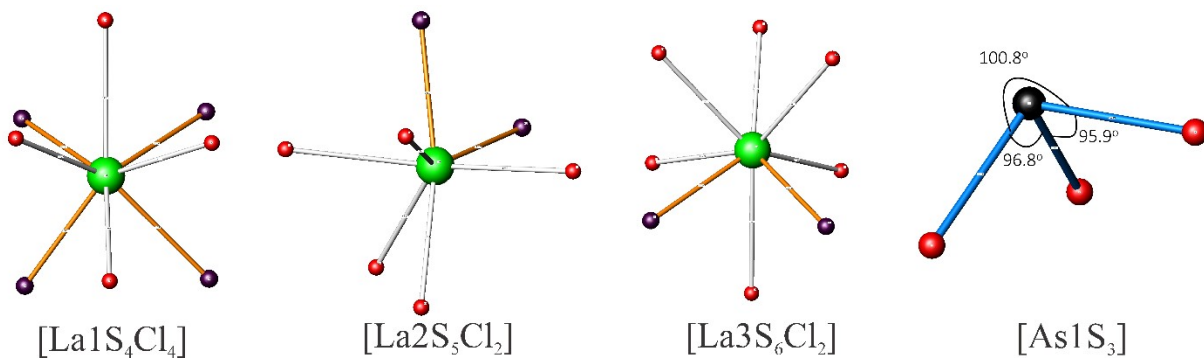

**Figure S5.** Basic building units (BBU) of  $\text{La}_5\text{As}_2\text{S}_9\text{Cl}_3$ .

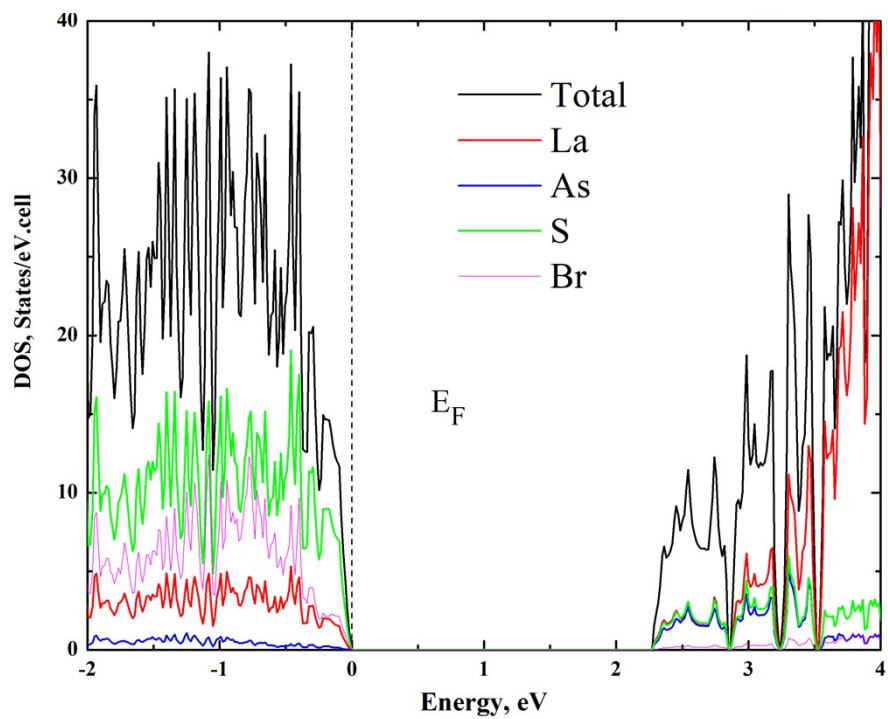

**Figure S6.** Density of states (DOS) of  $\text{La}_3\text{AsS}_5\text{Br}_2$ .
